# Supplementary material for: Community structure of gut bacteria of Dendroctonus armandi (Coleoptera: Curculionidae: Scolytinae) larvae during overwintering stage
Source: PubMed Central journal article supplement (PMC5660234; doi:10.1038/s41598-017-14724-y), 2017-10-27
Supplement: 41598_2017_14724_MOESM1_ESM.pdf [file 41598_2017_14724_MOESM1_ESM.pdf]

**Community structure of gut bacteria of *Dendroctonus armandi* (Coleoptera: Curculionidae: Scolytinae) larvae**  
**during overwintering stage**

Juan Wang<sup>2</sup>, Hui Chen<sup>1\*</sup> & Ming Tang<sup>1</sup>

**Supplementary Table S1**

The number of operational taxonomic units (OTUs) of Actinobacteria in each month from October 2015 to January 2016 of *Dendroctonus armandi* larvae.

| Phylum                    | Class               | Order             | Family               | Oct. 2015<br>(OTUs) | Nov. 2015<br>(OTUs) | Dec. 2015<br>(OTUs) | Jan. 2016<br>(OTUs) |
|---------------------------|---------------------|-------------------|----------------------|---------------------|---------------------|---------------------|---------------------|
| Actinobacteria            | Actinobacteria      | Actinomycetales   | Corynebacteriaceae   | 33                  | 11,704              | 79                  | 81                  |
|                           |                     |                   | Intrasporangiaceae   | 13                  | 3,454               | 669                 | 11                  |
|                           |                     |                   | Geodermatophilaceae  | 16                  | 210                 | 1,661               | 37                  |
|                           |                     |                   | Nocardiaceae         | 2                   | 1,154               | 297                 | 56                  |
|                           |                     |                   | Micromonosporaceae   | 622                 | 479                 | 119                 | 2                   |
|                           |                     |                   | Microbacteriaceae    | 3                   | 240                 | 11                  | 0                   |
|                           |                     |                   | Nocardioidaceae      | 0                   | 310                 | 43                  | 1                   |
|                           |                     |                   | Gordoniaceae         | 4                   | 87                  | 118                 | 2                   |
|                           |                     |                   | Mycobacteriaceae     | 7                   | 96                  | 14                  | 1                   |
|                           |                     |                   | Micrococcaceae       | 0                   | 95                  | 62                  | 4                   |
|                           |                     |                   | Streptomycetaceae    | 0                   | 4                   | 64                  | 0                   |
|                           |                     |                   | Propionibacteriaceae | 3                   | 42                  | 9                   | 1                   |
|                           |                     |                   | Dietziaceae          | 0                   | 18                  | 28                  | 4                   |
|                           |                     |                   | Nitriliruptoria      | Euzebyales          | Euzebyaceae         | 3                   | 518                 |
| Thermoleophilia           | Solirubrobacterales | Patulibacteraceae | 0                    | 39                  | 68                  | 0                   |                     |
| <b>Total shared reads</b> |                     |                   | <b>706</b>           | <b>18,450</b>       | <b>3,368</b>        | <b>203</b>          |                     |

## Supplementary Table S2

The number of operational taxonomic units (OTUs) of Proteobacteria in each month from October 2015 to January 2016 of *Dendroctonus armandi* larvae.

| Phylum                    | Class                     | Order              | Family              | Oct. 2015<br>(OTUs) | Nov. 2015<br>(OTUs) | Dec. 2015<br>(OTUs) | Jan. 2016<br>(OTUs) |
|---------------------------|---------------------------|--------------------|---------------------|---------------------|---------------------|---------------------|---------------------|
| Proteobacteria            | $\alpha$ - proteobacteria | Rhizobiales        | Rhizobiaceae        | 276                 | 4,294               | 1,290               | 86                  |
|                           |                           |                    | Methylobacteriaceae | 5                   | 1,089               | 846                 | 20                  |
|                           |                           |                    | Bradyrhizobiaceae   | 1                   | 44                  | 0                   | 0                   |
|                           |                           | Rhodobacterales    | Rhodobacteraceae    | 7                   | 42                  | 1,803               | 12                  |
|                           |                           | Sphingomonadales   | Sphingomonadaceae   | 77                  | 98                  | 1,430               | 9                   |
|                           |                           | Rhodospirillales   | Acetobacteraceae    | 337                 | 567                 | 182                 | 1                   |
|                           |                           | Caulobacterales    | Caulobacteraceae    | 1                   | 4                   | 46                  | 4                   |
|                           |                           | Rickettsiales      | Mitochondria        | 1                   | 22                  | 23                  | 0                   |
|                           | $\beta$ - proteobacteria  | Neisseriales       | Neisseriaceae       | 3                   | 691                 | 4                   | 64                  |
|                           |                           |                    | Comamonadaceae      | 0                   | 467                 | 149                 | 10                  |
|                           |                           | Burkholderiales    | Burkholderiaceae    | 0                   | 40                  | 75                  | 5                   |
|                           |                           |                    | Oxalobacteraceae    | 0                   | 42                  | 1                   | 1                   |
|                           |                           |                    | Alcaligenaceae      | 0                   | 4                   | 37                  | 1                   |
|                           |                           | Rhodocyclales      | Rhodocyclaceae      | 1                   | 101                 | 96                  | 1                   |
|                           | $\delta$ - proteobacteria | Desulfovibrionales | Desulfovibrionaceae | 0                   | 23                  | 223                 | 0                   |
|                           | $\gamma$ - proteobacteria | Alteromonadales    | Alteromonadaceae    | 6                   | 450                 | 386                 | 75                  |
|                           |                           |                    | UNCLASSIFIED        | 23,470              | 134,696             | 129,727             | 234,741             |
|                           |                           | Pseudomonadales    | Pseudomonadaceae    | 94                  | 194                 | 7,783               | 47                  |
|                           |                           |                    | Moraxellaceae       | 26                  | 1,418               | 442                 | 62                  |
|                           |                           | Xanthomonadales    | Xanthomonadaceae    | 32                  | 1,008               | 8,316               | 110                 |
| Sinobacteraceae           |                           |                    | 1                   | 13                  | 27                  | 1                   |                     |
| Enterobacteriales         |                           |                    | Enterobacteriaceae  | 102                 | 2,300               | 5,733               | 216                 |
| Legionellales             |                           | Coxiellaceae       | 3                   | 45                  | 377                 | 28                  |                     |
| Vibrionales               |                           | Vibrionaceae       | 0                   | 53                  | 1                   | 0                   |                     |
| <b>Total shared reads</b> |                           |                    |                     | <b>24,443</b>       | <b>147,705</b>      | <b>158,997</b>      | <b>235,494</b>      |

### Supplementary Table S3

The number of operational taxonomic units (OTUs) of Bacteroidetes, Firmicutes, Acidobacteria, Tenericutes and Deinococcus-Thermus in each month from October 2015 to January 2016 of *Dendroctonus armandi* larvae.

| Phylum                    | Class            | Order              | Family              | Oct. 2015<br>(OTUs) | Nov. 2015<br>(OTUs) | Dec. 2015<br>(OTUs) | Jan. 2016<br>(OTUs) |     |   |
|---------------------------|------------------|--------------------|---------------------|---------------------|---------------------|---------------------|---------------------|-----|---|
| Bacteroidetes             | Flavobacteriia   | Flavobacteriales   | Weeksellaceae       | 5                   | 131                 | 512                 | 29                  |     |   |
|                           |                  |                    | Flavobacteriaceae   | 21                  | 48                  | 92                  | 5                   |     |   |
|                           | Saprospirae      | Saprospirales      | Chitinophagaceae    | 52                  | 214                 | 290                 | 8                   |     |   |
|                           | Sphingobacteriia | Sphingobacteriales | Sphingobacteriaceae | 0                   | 182                 | 24                  | 0                   |     |   |
| Firmicutes                | Bacilli          | Bacillales         | UNCLASSIFIED        | 175,226             | 3,672               | 9,279               | 1,451               |     |   |
|                           |                  |                    | Bacillaceae         | 52                  | 12,259              | 1,502               | 105                 |     |   |
|                           |                  |                    | Paenibacillaceae    | 5                   | 452                 | 1,268               | 6                   |     |   |
|                           |                  |                    | Planococcaceae      | 4                   | 367                 | 429                 | 16                  |     |   |
|                           |                  |                    | Staphylococcaceae   | 2                   | 71                  | 15                  | 0                   |     |   |
|                           |                  |                    | Aerococcaceae       | 106                 | 15,577              | 1,411               | 101                 |     |   |
|                           |                  |                    | Enterococcaceae     | 10                  | 111                 | 41                  | 6                   |     |   |
|                           |                  |                    | Carnobacteriaceae   | 0                   | 26                  | 49                  | 0                   |     |   |
|                           |                  |                    | Streptococcaceae    | 0                   | 43                  | 60                  | 1                   |     |   |
|                           |                  |                    | Clostridiaceae      | 72                  | 340                 | 7,631               | 89                  |     |   |
|                           |                  |                    | Clostridia          | Clostridiales       | UNCLASSIFIED        | 0                   | 60                  | 268 | 1 |
|                           |                  |                    |                     |                     | Mogibacteriaceae    | 0                   | 45                  | 27  | 0 |
| Acidobacteria             | Acidobacteriia   | Acidobacteriales   | Acidobacteriaceae   | 6                   | 422                 | 904                 | 23                  |     |   |
| Tenericutes               | Mollicutes       | Entomoplasmatales  | UNCLASSIFIED        | 122                 | 8,319               | 1,996               | 54                  |     |   |
| Deinococcus-Thermus       | Deinococci       | Thermales          | Thermaceae          | 1                   | 2                   | 144                 | 0                   |     |   |
| <b>Total shared reads</b> |                  |                    |                     | <b>175,684</b>      | <b>42,341</b>       | <b>25,942</b>       | <b>1,895</b>        |     |   |

## Supplementary Table S4

Genera with significantly different abundances in each month from October 2015 to January 2016 of *Dendroctonus armandi* larvae of Proteobacteria.

| Phylum         | Genus                           | mean abundance |             |             |             | p value |
|----------------|---------------------------------|----------------|-------------|-------------|-------------|---------|
|                |                                 | Oct. 2015      | Nov. 2015   | Dec. 2015   | Jan. 2016   |         |
|                | <i>Pseudomonas</i>              | 0.000463069    | 0.000698862 | 0.040858536 | 0.00018518  | 0.0308  |
|                | <i>Pseudoxanthomonas</i>        | 0.000149377    | 0.004068718 | 0.043311947 | 0.000248309 | 0.0251  |
|                | <i>Agrobacterium</i>            | 0.00136929     | 0.020372312 | 0.006399975 | 0.000315647 | 0.0314  |
|                | <i>Aquamonas</i>                | 0.0000996      | 0.006572177 | 0.022682186 | 0.000366151 | 0.0158  |
|                | <i>Anaerospira</i>              | 0.0000349      | 0.000201043 | 0.009512905 | 0.0000505   | 0.0106  |
|                | <i>Sphingosinicella</i>         | 0.000373443    | 0.0000574   | 0.007286369 | 0.0000168   | 0.0082  |
|                | <i>Erwinia</i>                  | 0.0000299      | 0.001282843 | 0.005666589 | 0.000210432 | 0.0241  |
|                | <i>Methylobacterium</i>         | 0.0000199      | 0.004949476 | 0.004400312 | 0.0000842   | 0.0311  |
|                | <i>Marinobacter</i>             | 0.0000299      | 0.00207744  | 0.001888863 | 0.000265144 | 0.0225  |
|                | <i>Neisseria</i>                | 0.0000149      | 0.003307629 | 0.0000211   | 0.000269352 | 0.0120  |
|                | <i>Comamonas</i>                | 0.00000498     | 0.001498246 | 0.0000106   | 0.00000842  | 0.0106  |
|                | <i>Methyloversatilis</i>        | 0.00000498     | 0.000483459 | 0.000506511 | 0.00000421  | 0.0073  |
|                | <i>Acinetobacter</i>            | 0.00000996     | 0.000722796 | 0.0000739   | 0.0000210   | 0.0052  |
|                | <i>Rhizobium</i>                | 0              | 0.000181896 | 0.000406264 | 0.0000463   | 0.0067  |
|                | <i>Burkholderia</i>             | 0              | 0.000191469 | 0.000395712 | 0.0000210   | 0.0092  |
| Proteobacteria | <i>Schlegelella</i>             | 0              | 0.000157962 | 0.000263808 | 0.00000842  | 0.0045  |
|                | <i>Novosphingobium</i>          | 0.00000996     | 0.000268057 | 0.000116075 | 0.0000210   | 0.0134  |
|                | <i>Enhydrobacter</i>            | 0              | 0.000220189 | 0.0000844   | 0.0000253   | 0.0026  |
|                | <i>Acetobacter</i>              | 0              | 0.00029199  | 0.0000317   | 0           | 0.0011  |
|                | <i>Candidatus. Hamiltonella</i> | 0.00000498     | 0           | 0.000337674 | 0           | 0.0086  |
|                | <i>Sphingomonas</i>             | 0              | 0.000143602 | 0.000142456 | 0           | 0.0023  |
|                | <i>Cellvibrio</i>               | 0              | 0.0000766   | 0.000147732 | 0.0000505   | 0.0014  |
|                | <i>Stenotrophomonas</i>         | 0              | 0.000114881 | 0.000168837 | 0           | 0.0012  |
|                | <i>Brevundimonas</i>            | 0.00000498     | 0.0000191   | 0.000242703 | 0.0000168   | 0.0224  |
|                | <i>Photobacterium</i>           | 0              | 0.000253697 | 0.00000528  | 0           | 0.0168  |
|                | <i>Zea</i>                      | 0.00000498     | 0.000105308 | 0.000121352 | 0           | 0.0264  |
|                | <i>Janthinobacterium</i>        | 0              | 0.000201043 | 0.00000528  | 0.00000421  | 0.0157  |
|                | <i>Tepidimonas</i>              | 0              | 0.000201043 | 0           | 0.00000421  | 0.0294  |
|                | <i>Steroidobacter</i>           | 0.00000498     | 0.0000622   | 0.000142456 | 0.00000421  | 0.0304  |
|                | <i>Achromobacter</i>            | 0              | 0.0000191   | 0.000195218 | 0.00000421  | 0.0185  |

## Supplementary Table S5

Genera with significantly different abundances in each month from October 2015 to January 2016 of *Dendroctonus armandi* larvae of Actinobacteria, Firmicutes, Bacteroidetes, Acidobacteria, Tenericutes and Deinococcus-Thermus.

| Phylum              | Genus                    | mean abundance |             |             |             | p value |
|---------------------|--------------------------|----------------|-------------|-------------|-------------|---------|
|                     |                          | Oct. 2015      | Nov. 2015   | Dec. 2015   | Jan. 2016   |         |
| Actinobacteria      | <i>Corynebacterium</i>   | 0.000164315    | 0.056023857 | 0.000416816 | 0.000340899 | 0.0251  |
|                     | <i>Knoellia</i>          | 0.0000647      | 0.016533356 | 0.003529747 | 0.0000463   | 0.0162  |
|                     | <i>Blastococcus</i>      | 0.0000797      | 0.001005213 | 0.008763692 | 0.000155719 | 0.0145  |
|                     | <i>Rhodococcus</i>       | 0.00000996     | 0.005523883 | 0.001567018 | 0.000235683 | 0.0206  |
|                     | <i>Euzebya</i>           | 0.0000149      | 0.002479525 | 0.000664795 | 0.0000126   | 0.0113  |
|                     | <i>Salinibacterium</i>   | 0.0000149      | 0.001148815 | 0.0000580   | 0           | 0.0195  |
|                     | <i>Actinopolymorpha</i>  | 0              | 0.001120094 | 0           | 0           | 0.0023  |
|                     | <i>Gordonia</i>          | 0.0000199      | 0.000416445 | 0.000622586 | 0.00000842  | 0.0244  |
|                     | <i>Mycobacterium</i>     | 0.0000349      | 0.000459526 | 0.0000739   | 0.00000421  | 0.0178  |
|                     | <i>Patulibacter</i>      | 0              | 0.000186682 | 0.000358778 | 0           | 0.0069  |
|                     | <i>Micrococcus</i>       | 0              | 0.000296777 | 0.000200494 | 0.00000421  | 0.0112  |
|                     | <i>Streptomyces</i>      | 0              | 0.0000191   | 0.000337674 | 0           | 0.0074  |
|                     | <i>Propionibacterium</i> | 0.0000149      | 0.000201043 | 0.0000475   | 0.00000421  | 0.0123  |
|                     | <i>Pimelobacter</i>      | 0              | 0.000205829 | 0.0000580   | 0           | 0.0046  |
| <i>Dietzia</i>      | 0                        | 0.0000862      | 0.000147732 | 0.0000168   | 0.0227      |         |
| Firmicutes          | <i>Alloiococcus</i>      | 0.000527799    | 0.074251715 | 0.007365511 | 0.000425072 | 0.0240  |
|                     | <i>Anoxybacillus</i>     | 0.00025892     | 0.058565609 | 0.007787603 | 0.000441906 | 0.0155  |
|                     | <i>Clostridium</i>       | 0.000358505    | 0.001627487 | 0.04026233  | 0.000374568 | 0.0197  |
|                     | <i>Ammoniphilus</i>      | 0.0000249      | 0.002154027 | 0.004669396 | 0.0000253   | 0.0146  |
|                     | <i>Solibacillus</i>      | 0.0000199      | 0.001756729 | 0.00226347  | 0.0000673   | 0.0246  |
|                     | <i>Paenibacillus</i>     | 0              | 0.00000957  | 0.002020767 | 0           | 0.0153  |
|                     | <i>Enterococcus</i>      | 0.0000498      | 0.000531327 | 0.000216322 | 0.0000253   | 0.0211  |
|                     | <i>Staphylococcus</i>    | 0.00000996     | 0.000339858 | 0.0000791   | 0           | 0.0056  |
|                     | <i>Aerococcus</i>        | 0              | 0.000311137 | 0.0000791   | 0           | 0.0161  |
|                     | <i>Desemzia</i>          | 0              | 0.000124455 | 0.000258532 | 0           | 0.0043  |
|                     | <i>Streptococcus</i>     | 0              | 0.0000814   | 0.000221598 | 0           | 0.0165  |
|                     | <i>Bacillus</i>          | 0              | 0.000114881 | 0.00013718  | 0           | 0.0034  |
|                     | <i>Lactococcus</i>       | 0              | 0.000124455 | 0.0000950   | 0.00000421  | 0.0374  |
| Bacteroidetes       | <i>Chryseobacterium</i>  | 0.0000249      | 0.000627061 | 0.002701391 | 0.00012205  | 0.0182  |
|                     | <i>Sphingobacterium</i>  | 0              | 0.000871184 | 0.000126628 | 0           | 0.0079  |
|                     | <i>Chitinophaga</i>      | 0.00000498     | 0.0000574   | 0.000949708 | 0.00000842  | 0.0162  |
|                     | <i>Flavobacterium</i>    | 0.000104564    | 0.000229763 | 0.000485406 | 0.0000210   | 0.0214  |
| Acidobacteria       | <i>Edaphobacter</i>      | 0.0000249      | 0.001900331 | 0.004674672 | 0.0000800   | 0.0182  |
| Tenericutes         | UNCLASSIFIED             | 0.000607467    | 0.039820785 | 0.010531203 | 0.000227266 | 0.0157  |
| Deinococcus-Thermus | <i>Meiothermus</i>       | 0.00000498     | 0.00000957  | 0.000759766 | 0           | 0.0072  |
